# Supplementary material for: “I did not expect the doctor to treat a ghost”: a systematic review of published reports regarding chronic postamputation pain in British First World War veterans
Source: PubMed Central journal article supplement — Pain Rep. 2023 Oct 17;8(6):e1094. doi: 10.1097/PR9.0000000000001094 (PMC10584288; doi:10.1097/pr9.0000000000001094), 2023-10-17
Supplement: painreports-8-e1094-s001.pdf [file painreports-8-e1094-s001.pdf]

## Appendix 1: Search Strategy

The primary search of the *British Medical Journal* was carried out through JSTOR as the only online repository to hold the journal for the dates 1914 to 1985. Ideally, *The Lancet* would have been searched through the same database, but as this title is not available through JSTOR, was instead searched using its own online archive. Full text from 1914 to 1985 was searched using the search string:

*Amputate OR amputates OR amputated OR amputation OR amputations OR amputatio OR amputating OR amputee OR amputees OR "nerve damage" OR neuropraxia OR "nerve injury" OR "nerve injuries" OR "nerve trauma" OR "nerve traumas" OR neurapraxia OR axonotmesis OR neurotmesis OR causalgia OR causalgic OR neuralgia OR neuralgic OR neuroma OR "nerve bulb" OR "nerve bulbs"*.

The title and abstract were extracted from the results and downloaded into Endnote, where duplicates were reviewed and deleted using an in-built tool. A record was made of the number of texts deleted at this stage. The remaining search results were imported into the online platform Covidence and a second duplicate search was run before screening.

Records of each journal and database search were kept at every stage detailing the number of texts found and retrieved for each search term and journal, the total excluded after secondary screening, and the error rate found after comparing results from the three archives, in accordance with PRISMA guidelines.

## References

Barford A. Treatment of the Main Nerves in Amputations. *The British Medical Journal* 1916; 2904: 309. DOI: 10.2307/20305078

Barling G. Surgical Experiences at the 1st Southern General Hospital, Birmingham. *The British Medical Journal* 1915; 282: 190-192. DOI: 10.2307/25312517

Blanchet P. Post-Traumatic Causalgias. *The British Medical Journal* 1931; 3688: 499. DOI: 10.2307/25340679.

Bury JS. Note on the Distant Effects of Rifle Bullets: With Special Reference to the Spinal Cord. *The British Medical Journal* 1916; 2902: 212. DOI: 10.2307/20304923

Carleton HH. Pain in Phantom Limbs. *The British Medical Journal* 1948; 4560: 1052

Chapple WA. Prevention of Nerve Bulbs in Stumps. *The British Medical Journal* 1914; 2988: 399

Coombe R. Treatment of the Main Nerves in Amputations. *The British Medical Journal* 1916; 2904: 309

Corner EM. Abstract of the Harbeian Lecture on Nerves in Amputation Stumps. *The British Medical Journal* 1919; 3047: 638. DOI: 10.2307/20337682

Corner EM. Light Metal Limbs in Above-Knee Amputations. *The British Medical Journal* 1921; 3145: 524-525

Corner EM. Amputations: The Effect of War Knowledge on Teaching, Practice and After-Care. *The Lancet*; 5081: 114-115. DOI: 10.2307/20427097

Corner EM. War Scars and Their Pains: With Special Reference to Painful Amputation Stumps. *The British Medical Journal* 1918; 2998: 665-666. DOI: 10.2307/20310310

Craft AWJ. Surgical Amputations and the Fitting of Artificial Limbs. *The British Medical Journal* 1942; 4265: 389-392. DOI: 10.2307/20324245

Fischer-Williams M. Treatment of Chronic Pain. *The British Medical Journal* 1956; 4966: 533-538. DOI: 10.2307/20334703

Fitzmaurice-Kelly M. Amputations in War Surgery. *The Lancet* 1915; 4766: 15-16. DOI: 10.1016/S0140-6736(01)48138-4.

Fortescue Fox R, Campbell McClure J. A New Combined Physical Treatment for Wounded and Disabled Soldiers (Heat, Massage, Electricity, Movements). *The Lancet* 1916; 4823: 311-312. DOI: 10.1016/S0140-6736(01)10925-6

Gillis L. Pain in Phantom Limbs. *The British Medical Journal* 1948; 4561: 1108-109. DOI: 10.2307/25363818

Gillis L. Cineradiography in Orthopaedic Surgery. *The British Medical Journal* 1947; 4516: 140-141. DOI: 10.2307/20370251

Grace JJ. A Note on the Electrical Treatment of Disabilities Due to Wounds. *The British Medical Journal* 1915; 2866: 812-813. DOI: 10.2307/25315426

Harman JB. The Localization of Deep Pain. *The British Medical Journal* 1948; 4543: 188-192. DOI: 10.2307/25362175

Harris W. Persistent Pain in Lesions of the Peripheral and Central Nervous System. *The British Medical Journal* 1921; 3178: 896-900. DOI: 10.2307/20429164

Hill L. An Economical Design of the Melted Paraffin Wax Bath. *The British Medical Journal* 1934; 3838: 171. DOI: 10.2307/25321785

Huggins GM. The Surgery of Amputation Stumps: Based on the Experience of 2000 Consecutive Cases. *The Lancet* 1917; 4887: 646-648. DOI: 10.1016/S0140-6736(01)48965-3

Jocelyn Swan RH. Gunshot Injuries to Peripheral Nerves. *The Lancet* 1915; 4811: 1081-1083. DOI: 10.1016/S0140-6736(00)53891-4

Kennedy R. On the Prognosis of Nerve Injuries. *The Lancet* 1919; 5001: 5-9. DOI: 10.1016/S0140-6736(01)48326-7

Latham PW. On Causalgia and Allied Changes in the Joints. *The Lancet* 1918; 4944: 780-781. DOI: 10.1016/S0140-6736(01)27283-3

Le Fleming Burrow J, Carter HS. Preliminary Note on Investigations Upon One Thousand Consecutive Cases of Peripheral Nerve Injury, *The British Medical Journal* 1918; 3020: 535-538. DOI: 10.2307/20336213

Leriche R. Surgery of Pain, *The British Medical Journal* 1939; 4086: 874. DOI: 10.2307/20303266

Little ME. Modern Artificial Limbs and Their Influence Upon Methods of Amputation: General Considerations. *The British Medical Journal* 1917; 2965: 550-553. DOI: 10.2307/20308564

Llewellyn LJ, Jones AB, Beaumont WM. War Pensions. *The British Medical Journal* 1919; 3040: 413. DOI: 10.2307/41827621

Lockhart-Mummery P. The War Office Memorandum on Amputations and Amputation Stumps. *The British Medical Journal*; 2893: 836-837. DOI: 10.2307/25317108

Macdonald WM. Tinel's Sign in Peripheral Nerve Lesions. *The British Medical Journal* 1918; 3001: 6-8. DOI: 10.2307/20310465

McKenzie RT. The Treatment of Convalescent Soldiers by Physical Means. *The British Medical Journal* 1916; 2902:215-218. DOI: 10.2307/20304925

Mitchell WRD. Avoidable Disability Seen in Recent Amputations. *The British Medical Journal* 1942; 4212: 437-438. DOI: 10.2307/20321180

Moynihan B. An Address on Injuries to the Peripheral Nerves and Their Treatment. *The British Medical Journal* 1917; 2966: 571-574. DOI: 10.2307/20308607

Platt H. The Surgery of the Peripheral Nerve Injuries of Warfare. *The British Medical Journal* 1921; 3147: 596-600. DOI: 10.2307/20427242

Russell WR. Painful Amputation Stumps and Phantom Limbs: Treatment by Repeated Percussion to The Stump Neuromata. *The British Medical Journal* 1949; 4614: 1024-1026. DOI: 10.2307/25372437

Russell WR, Spalding JMK. Treatment of Painful Amputation Stumps. *The British Medical Journal* 1950; 4670: 68-73. DOI: 10.2307/25357594

Sargent P. Review: The Surgery of Peripheral Nerve Injuries. *The British Medical Journal* 1922; 3194: 440. DOI: 10.2307/20430339

Sheild AM. Treatment of the Main Nerves in Amputation. *The Lancet* 1916; 4851: 342-343. DOI: 10.1016/S0140-6736(00)97260-X

Sheild AM. Some Practical Observations on the Injuries of War. *The Lancet* 1916; 4868: 1003-1005. DOI: 10.1016/S0140-6736(00)54355-4

Sheild AM. Treatment of the Main Nerves in Amputations. *The British Medical Journal* 1916; 2903: 273. DOI: 10.2307/20305016

Sliosberg A. Pain in Phantom Limbs. *The British Medical Journal* 1948; 4561: 1108-1109. DOI: 10.2307/25363818

Souttar HS. An Address on Some Points Arising in Nerve Injuries. *The British Medical Journal* 1917; 2973: 817-820. DOI: 10.2307/20308944

Stevenson WC. The Effects of Radium Treatment on War Injuries in the Neighbourhood of Nerves. *The British Medical Journal* 1920; 3104: 862-864. DOI: 10.2307/20341180

Stopford JB. Thermalgia (Causalgia). *The Lancet* 1917; 4902: 195-199. DOI: 10.1016/S0140-6736(01)51018-1

Stopford JB. So-Called Functional Symptoms in Organic Nerve Injuries. *The Lancet* 1918; 4945: 795-796. DOI: 10.1016/S0140-6736(01)26794-4

Sutherland RW, Christie JM. Some Notes on Military Orthopaedics. *The British Medical Journal* 1920; 3101: 762-764. DOI: 10.2307/20340995

Taylor J. Surgical Treatment of Pain. *The Lancet* 1938; 6012: 1151-1154. DOI: 10.1016/S0140-6736(00)74954-3

Thorburn W. Remarks on Posterior Rhizotomy for the Relief of Pain. *The British Medical Journal* 1921; 3148: 629-631. DOI: 10.2307/20427308

Thorburn W, Sargent P. Discussion on the End-Results of Injuries to the Peripheral Nerves Treated by Operation. *The British Medical Journal* 1920; 3117: 462-467. DOI: 10.2307/20425255

Tippett GO. The Amputee's Point of View. *The Lancet* 1942; 6223: 684. DOI: 10.1016/S0140-6736(00)89276-4

Trotter W. The General Surgery of Gunshot Wounds of Nerves. *The Lancet* 1915; 4810: 1023-1026. DOI: 10.1016/S0140-6736(01)58568-2

Tubby AH. Remarks on Cases of Nerve Concussion Due to Bullet and Shell Wounds. *The British Medical Journal* 1915; 2829: 57-59. DOI: 10.2307/25312300

Turrell WJ. The Electrical Treatment of the Wounded. *The Lancet* 1916; 4868: 1005-1008. DOI: 10.1016/S0140-6736(00)54356-6

Verrall PJ. Surgical Procedures in General Practice: Amputation Stumps and Artificial Limbs. *The British Medical Journal* 1940; 4123: 62-64. DOI: 10.2307/20315201

Vitali M, Kohn J. Treatment of Painful Amputation Stumps. *The British Medical Journal* 1950; 4675: 415. DOI: 10.2307/25358076

Wellish GC. Syme's Amputation. *The Lancet* 1955; 6854: 102. DOI: 10.1016/S0140-6736(55)90040-4

A Conference on Injuries. *The Lancet* 1942; 6220: 583-584. DOI: 10.1016/S0140-6736(00)75322-0

Amputations. *The Lancet* 1939; 6059: 837-838. DOI: 10.1016/S0140-6736(00)62916-1

Amputations and Artificial Limbs. *The Lancet* 1930; 5563: 814-815. DOI: 10.1016/S0140-6736(00)88432-9

Amputations and Amputation Stumps. *The British Medical Journal* 1916; 2884: 534-535. DOI: 10.2307/25316548

An Epitome of Current Medical Literature: Electrical Treatment of Nerve Injuries. *The British Medical Journal* 1915; 2860: 33-36. DOI: 10.2307/25315140

An Epitome of Current Medical Literature: Gunshot Wounds of Peripheral Nerves. *The British Medical Journal* 1917; 2925: 1-4. DOI: 10.2307/20306311

An Epitome of Current Medical Literature: Local Treatment of Nerve Lesions. *The British Medical Journal* 1916; 2898: 1-4. DOI: 10.2307/20304728

An Epitome of Current Medical Literature: Operation for Neuralgia of the Third Cervical Nerve from Gunshot Injury. *The British Medical Journal* 1917; 2929: 5-8. DOI: 10.2307/20306573

An Epitome of Current Medical Literature: Paralysis of Peripheral Nerves in War Wounds. *The British Medical Journal* 1917; 2961: 9-12. DOI: 10.2307/20308391

An Epitome of Current Medical Literature: Wounds of Peripheral Nerves. *The British Medical Journal* 1916; 2912: 13-16. DOI: 10.2307/20305516

Annotations: Treatment of Painful Neuritis Resulting from Wounds of War. *The Lancet* 1918; 4928: 223-226. DOI: 10.1016/S0140-6736(01)23589-2

Any Questions?: Treatment of a Phantom Leg. *The British Medical Journal* 1955; 4917: 863-864. DOI: 10.2307/20363129

Brighton Hospital for Patients Who Have Lost Limbs. *The British Medical Journal* 1916; 2888: 667-668. DOI: 10.2307/25316794

Epitome of Current Medical Literature: Anginal Attacks Caused by Pain in the Left Arm. *The British Medical Journal* 1925; 3347: 33-36. DOI: 10.2307/25444370

Epitome of Current Medical Literature: Surgery: Late Effects of Amputations on the General Health. *The British Medical Journal* 1935; 3880: 79-82. DOI: 10.2307/25344241

France: Professor Leriche on Amputation Stumps. *The British Medical Journal* 1939; 4116: 1055-1056. DOI: 10.2307/20314708

German Experiences of War Surgery: Nerve Injuries. *The British Medical Journal* 1915; 2857: 517-518. DOI: 10.2307/25314939

Gunshot Wounds of the Peripheral Nerves. *The Lancet* 1915; 4810: 1029. DOI: 10.1016/S0140-6736(00)53625-3

Injuries of the Peripheral Nerves. *The Lancet* 1915; 4785: 1039-1040. DOI: 10.1016/S0140-6736(01)65627-7

International Congress of Surgery (Continued). *The British Medical Journal* 1923; 3265: 379-382. DOI: 10.2307/20424154

International Society of Surgery (Continued). *The British Medical Journal* 1914; 2783: 975-976. DOI: 10.2307/25309795

Lesions of Peripheral Nerves Resulting from War Injuries: Pathology and Treatment. *The British Medical Journal* 1918; 2987: 379-382. DOI: 10.2307/20309766

Letters, Notes and Answers: Muscular Spasms in Stump After Amputation. *The British Medical Journal* 1930; 3621: 1031-1032. DOI: 10.2307/25336300

Medical Society of London: Modern Artificial Limbs and their Influence Upon Methods of Amputation. *The Lancet* 1917; 4913: 645-647. DOI: 10.1016/S0140-6736(01)52468-X

Medical Society of London: Re-Education of the Amputated. *The Lancet* 1920; 5040: 768-770. DOI: 10.1016/S0140-6736(01)12058-1

Obituary: Albert Alexander Atkinson. *The Lancet* 1948; 6498: 429. DOI: 10.1016/S0140-6736(48)90305-5

Prosthesis of the Lower Limb. *The Lancet* 1919; 1978: 149-151. DOI: 10.1016/S0140-6736(01)25276-3

Quick Diagnosis of Peripheral Nerve Injuries. *The Lancet* 1944; 6307: 83. DOI: 10.1016/S0140-6736(00)42971-5

Reports of Societies: After-Treatment of Stumps. *The British Medical Journal* 1919; 3029: 73-74. DOI: 10.2307/20336697

Reports of Societies: Amputations and Their Relation to the Artificial Limb. *The British Medical Journal* 1930; 3614: 693-698. DOI: 10.2307/25335791

Reports of Societies: British Orthopaedic Society Annual Meeting: Amputations. *The British Medical Journal* 1940; 4124: 104-106. DOI: 10.2307/20315271

Reports of Societies: Discussion on Gunshot Wounds of Peripheral Nerves. *The British Medical Journal* 1915; 2861: 643-644. DOI: 10.2307/25315158

Reports of Societies: Discussion on Gunshot Wounds of Peripheral Nerves. *The British Medical Journal* 1915; 2862: 678-679. DOI: 10.2307/25315214

Reports of Societies: Nerve Injuries. *The British Medical Journal* 1918; 2984: 287-288. DOI: 10.2307/20309602

Reports of Societies: Painful Nerve Stumps. *The British Medical Journal* 1918; 3013: 345-346. DOI: 10.2307/20335864

Reports of Societies: Physical Therapeutics. *The British Medical Journal* 1920; 3129: 937-939. DOI: 10.2307/20426037

Reports of Societies: Some Amputation Problems, Section of Orthopaedics. Royal Society of Medicine, *The British Medical Journal* 1930; 3645: 823-827. DOI: 10.2307/25337872

Royal Society of Medicine: Section of Surgery. *The Lancet* 1916; 4849: 232-234. DOI: 10.1016/S0140-6736(01)30379-3

Royal Society of Medicine: Section of Surgery: Amputations and Their Relation to the Artificial Limb. *The Lancet* 1930; 5563: 807. DOI: 10.1016/S0140-6736(00)88427-5

Royal Society of Medicine: The Treatment of Persistent Pain due to Lesions of the Central and Peripheral Nervous Systems. *The Lancet* 1921; 5125: 1057-1059. DOI: 10.1016/S0140-6736(01)34315-5

The Treatment of Gunshot Wounds of the Nerves. *The British Medical Journal* 1915; 2837: 853-855. DOI: 10.2307/25313625

The Home Hospitals and The War: 3rd Northern General Hospital (T.F.). Sheffield. *The British Medical Journal* 1914; 2811: 854-856. DOI: 10.2307/25311733

The Treatment and Training of Wounded Men. *The British Medical Journal* 1916; 2902: 234-237. DOI: 10.2307/20305128

War Injuries of Peripheral Nerves. *The British Medical Journal* 1918; 3020: 551-552. DOI: 10.2307/20336228
